# Supplementary material for: Efficient ITO-free organic light-emitting devices with dual-functional PSS-rich PEDOT:PSS electrode by enhancing carrier balance
Source: Royal Society of Chemistry journal article supplement (doi:10.1039/c9tc00648f), 2019-01-01
Supplement: c9tc00648f1.pdf [file c9tc00648f1.pdf]

## Supporting Information

### **Efficient ITO-free organic light-emitting devices with dual-functional PSS-rich PEDOT:PSS electrode by enhancing carrier balance**

*Shihao Liu, Hongwei Yu, Qingyang Zhang, Xiang Zhang, Letian Zhang\*, Wenfa Xie\**

State key Laboratory of Integrated Optoelectronics, College of Electronics Science and  
Engineering, Jilin University, Changchun, 130012, People's Republic of China.

\*E-mail: zlt@jlu.edu.cn.; xiewf@jlu.edu.cn.

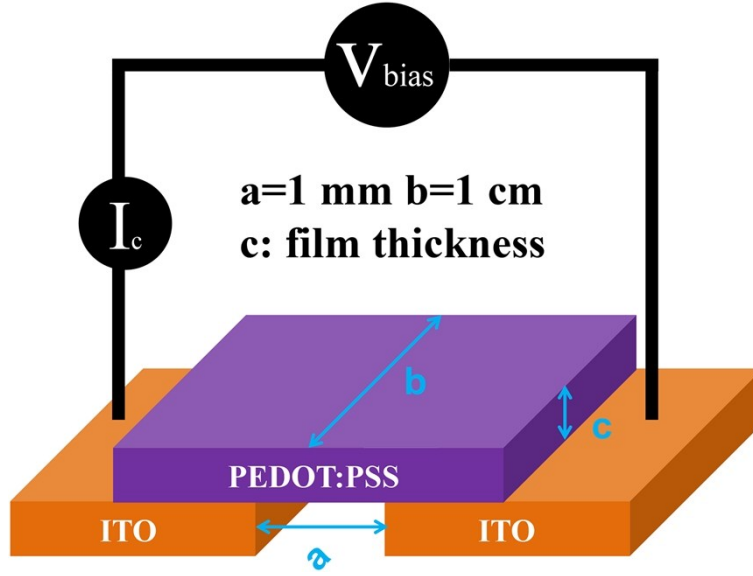

Figure S1. the test model for measuring the lateral conductivity of PEDOT:PSS films

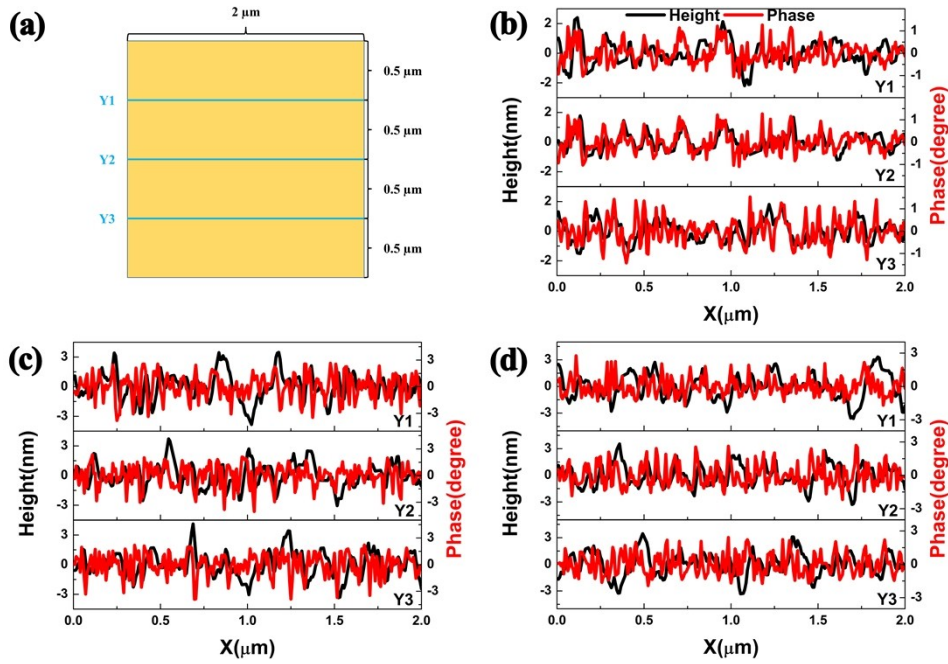

Figure S2. (a) the positions of cross-section curves Y1, Y2 and Y3, (b) (c) (d) the cross-section curves of PEDOT-1, PEDOT-2 and PEDOT-3 films, black curves represent the curves in height images and red curves represent the curves in phase images

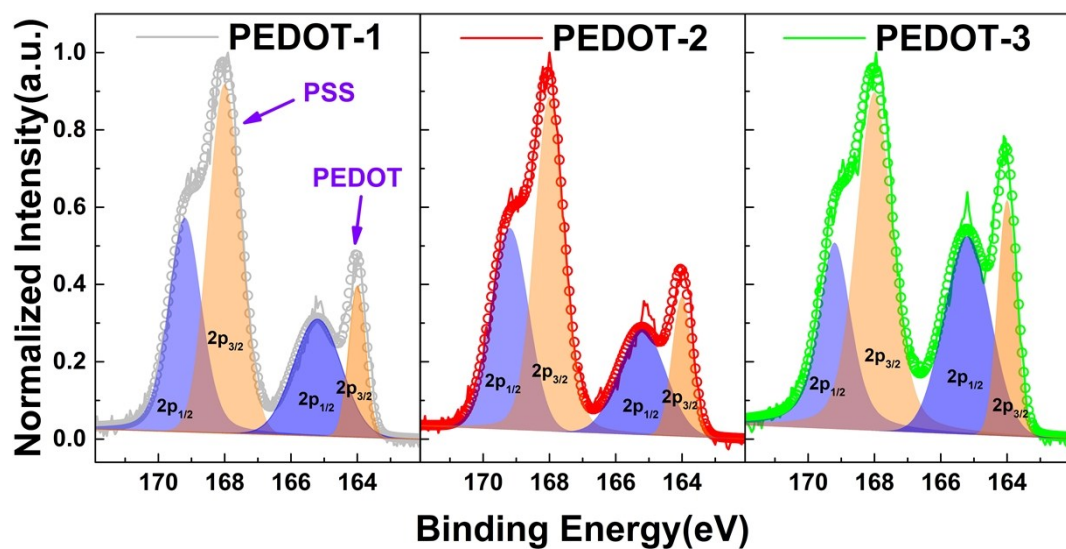

Figure S3. the X-ray photoelectron spectroscopic(XPS) spectra of PEDOT-1, PEDOT-2 and PEDOT-3

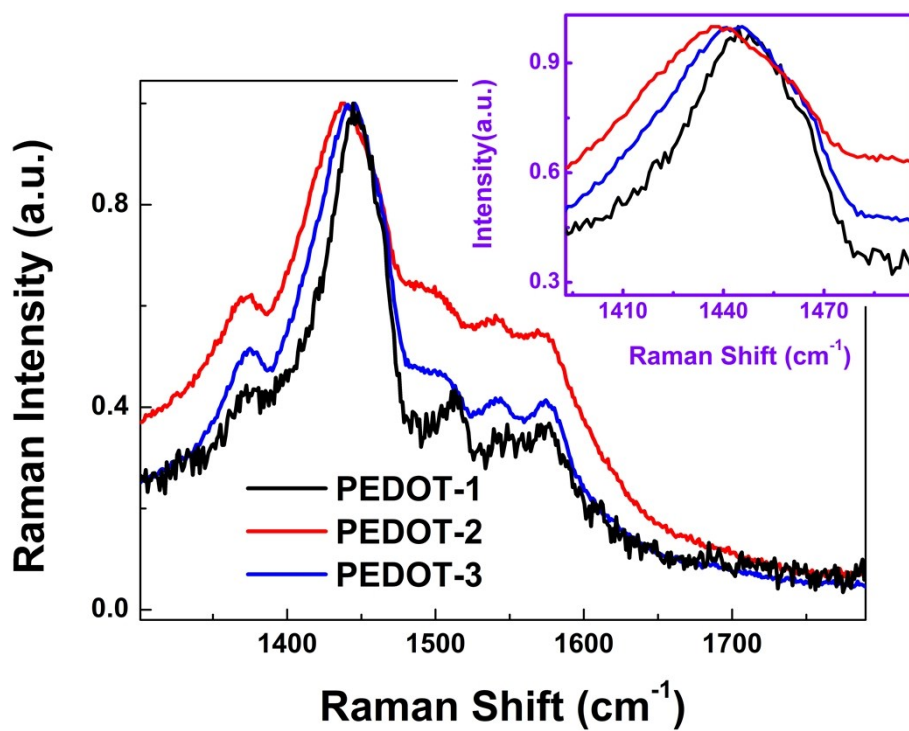

Figure S4. the Raman spectra of PEDOT-1, PEDOT-2 and PEDOT-3

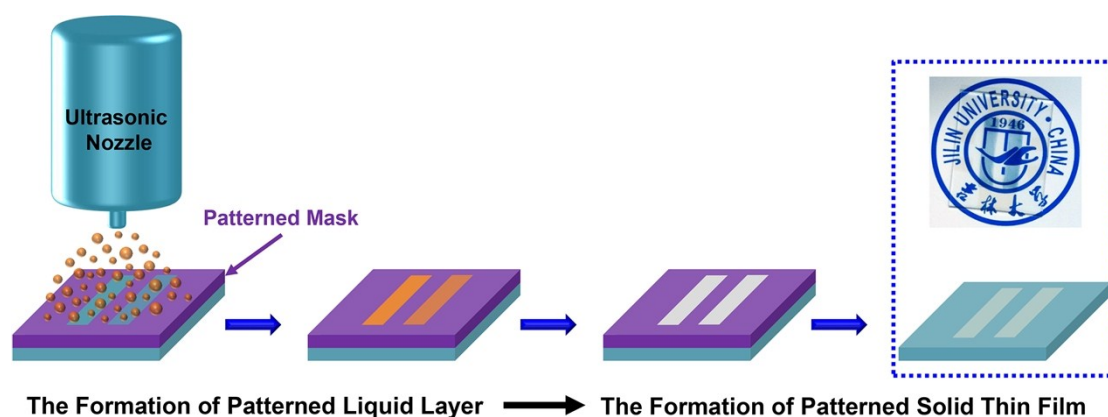

Figure S5. the fabrication process of patterned PEDOT:PSS films, the inset is the patterned PEDOT:PSS film

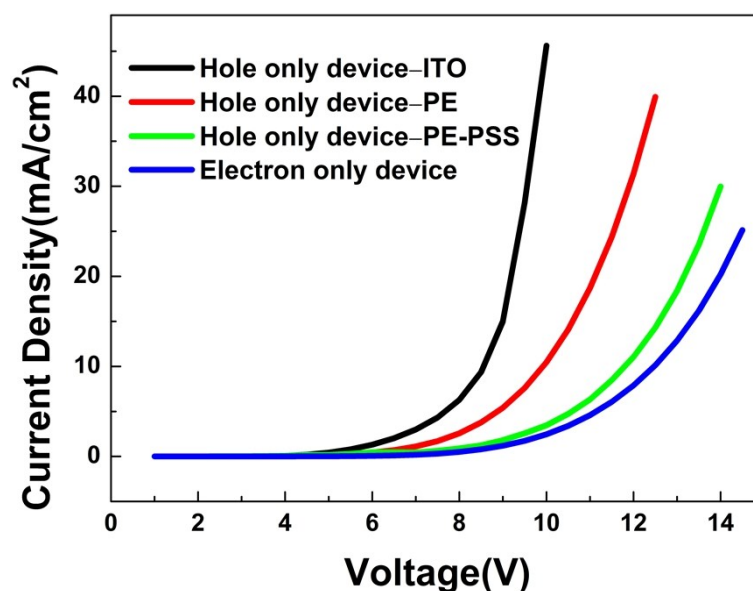

Figure S6. the current density-voltage characteristics of single carrier devices, the hole only device is ITO (for device ITO), PEDOT-3 (for device PE), PEDOT-2 (for device PE-PSS)/TAPC (25 nm)/TCTA (5 nm)/CBP: 10 wt% Ir(ppy)<sub>3</sub> (30 nm)/TAPC (45 nm)/MoO<sub>3</sub> (3 nm)/Mg:Ag (100 nm), the electron only device is ITO/TmPyPB (30 nm)/CBP: 10 wt% Ir(ppy)<sub>3</sub> (30 nm)/TmPyPB (45 nm)/LiF (1 nm)/Mg:Ag (100 nm).

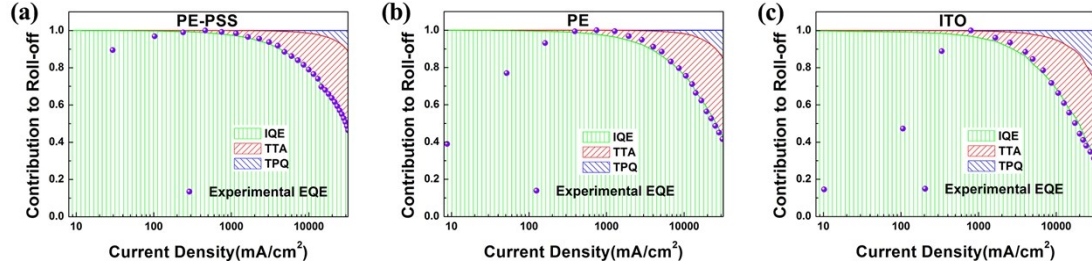

Figure S7. the contribution of TTA and TPQ to efficiency roll-off in Devices (a) PE-PSS, (b) PE and (c) ITO

Table S1. the fitting parameters used in the simulation

| $\tau$<br>( $\mu\text{s}$ ) | $W$<br>(nm) | $k_L (\text{cm}^{-3} \cdot \text{s}^{-1})$                           |                    |              | $k_{TT}$<br>( $\text{cm}^{-3} \cdot \text{s}^{-1}$ ) | $k_{TP}$<br>( $\text{cm}^{-3} \cdot \text{s}^{-1}$ ) |
|-----------------------------|-------------|----------------------------------------------------------------------|--------------------|--------------|------------------------------------------------------|------------------------------------------------------|
|                             |             | $\mu_h$<br>( $\text{cm}^2 \cdot \text{V}^{-1} \cdot \text{s}^{-1}$ ) | $\mu_e$            | $\epsilon_r$ |                                                      |                                                      |
| 1.6                         | 30          | $2 \times 10^{-3}$                                                   | $3 \times 10^{-4}$ | 3            | $6 \times 10^{-12}$                                  | $5.6 \times 10^{-13}$                                |

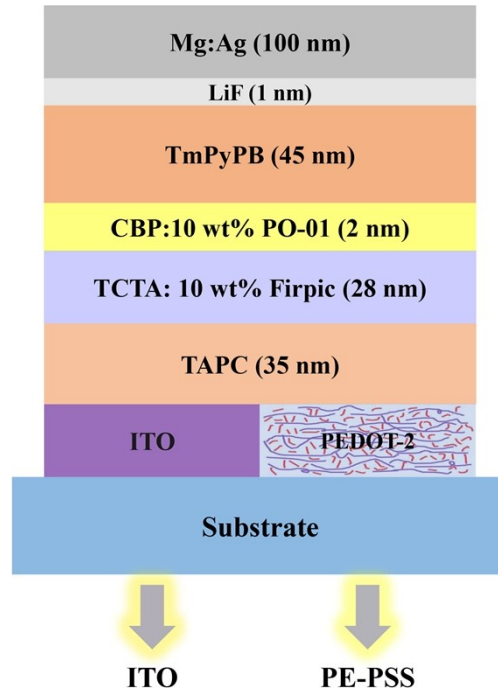

Figure S8. the device structure of white device PE-PSS and ITO-based white device

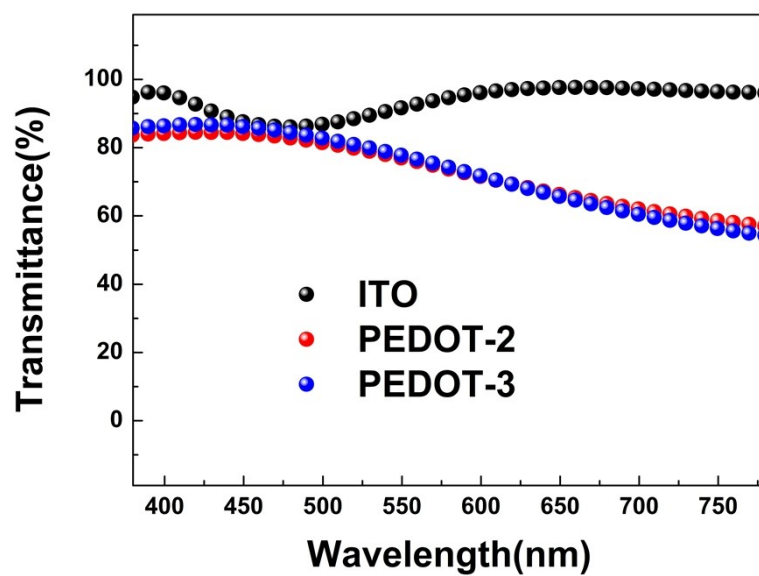

Figure S9. the transmittance of ITO, PEDOT-2 and PEDOT-3 films
